# Supplementary material for: Ecological features and insecticide resistance of Aedes albopictus in Xi’an, a high-risk dengue transmission area in China
Source: PeerJ. 2024 Oct 22;12:e18246. doi: 10.7717/peerj.18246 (PMC11505881; doi:10.7717/peerj.18246)
Supplement: Data S1 [file peerj-12-18246-s001.xlsx]

## Sheet: Table S1
Additional file 1: Table S1. Coordinate information of the eight samples sampling sites.
sampling sites	latitude	longitude
YT	108.878	34.2168
WY	108.968	34.3896
BL	108.96	34.2483
YL	109.304	34.6373
ZZ	108.347	34.06
LT	109.332	34.1726
LN	109.228	34.3873
CH	108.94	34.1323
