# Supplementary material for: Ecological features and insecticide resistance of Aedes albopictus in Xi’an, a high-risk dengue transmission area in China
Source: PeerJ. 2024 Oct 22;12:e18246. doi: 10.7717/peerj.18246 (PMC11505881; doi:10.7717/peerj.18246)
Supplement: Data S2 [file peerj-12-18246-s002.xlsx]

## Sheet: Sheet1
Additional file 2: Table S2. The BI value from 2021 to 2022.
2021 (BI)
Study area	Jun	Jul	Aug	Sep	Annual average	F	P
YT	13.3333	10	15	6.66667	11.4286	7.87	0.001
WY	11.1111	20	33.3333	10	17.6471
BL	5.55556	25	25	5	14.8649
YL	5	5.55556	22.2222	4	8.64198
ZZ	5	6.66667	13.6364	6.66667	8.33333
LT	6.66667	0	11.1111	0	4.61538
LN	6.66667	10	12.5	0	7.14286
CH	6.66667	6.66667	16.6667	6.66667	9.52381
Monthly average	7.35294	10.7692	18.1818	5	10.3825
2022 (BI)
Study area	Jun	Jul	Aug	Sep	Annual average	F	P
YT	6.66667	13.3333	6.66667	6.66667	8.33333	6.26	0.002
WY	12.5	20	10	5	11.8421
BL	6.25	20	15	5	11.8421
YL	6.66667	13.3333	13.3333	5.88235	9.67742
ZZ	6.25	13.3333	5.55556	10	8.47458
LT	5.88235	6.66667	4	7.14286	5.6338
LN	0	6.66667	8.33333	6.66667	5.26316
CH	6.66667	13.3333	10	6.66667	9.09091
Monthly average	6.4	13.8462	8.88889	6.34921	8.91473
