# Supplementary material for: Ecological features and insecticide resistance of Aedes albopictus in Xi’an, a high-risk dengue transmission area in China
Source: PeerJ. 2024 Oct 22;12:e18246. doi: 10.7717/peerj.18246 (PMC11505881; doi:10.7717/peerj.18246)
Supplement: Data S3 [file peerj-12-18246-s003.xlsx]

## Sheet: Table S3
Additional file 2: Table S3. The CI value from 2021 to 2022.
2021 (CI)
Study area	Jun	Jul	Aug	Sep	Annual average	F	P
YT	25	28.5714	33.3333	14.2857	25.8065	3.569	0.026
WY	25	37.5	41.6667	28.5714	34.2857
BL	14.2857	62.5	40	14.2857	34.375
YL	16.6667	14.2857	44.4444	16.6667	25
ZZ	16.6667	12.5	33.3333	25	22.2222
LT	20	0	22.2222	0	13.0435
LN	20	16.6667	20	0	17.3913
CH	16.6667	16.6667	33.3333	20	23.0769
monthly average	19.6078	25	33.7662	17.0732	25.3333
2022 (CI)
Study area	Jun	Jul	Aug	Sep	Annual average	F	P
YT	25	25	16.6667	16.6667	20.8333	3.636	0.025
WY	33.3333	50	33.3333	12.5	32.1429
BL	16.6667	40	42.8571	12.5	29.0323
YL	20	25	25	12.5	20.6897
ZZ	25	25	20	11.1111	19.2308
LT	20	12.5	20	14.2857	16
LN	0	16.6667	20	14.2857	14.2857
CH	20	28.5714	25	20	23.8095
Monthly average	21.0526	28.5714	26.087	13.7931	22.439
