# Supplementary material for: Ecological features and insecticide resistance of Aedes albopictus in Xi’an, a high-risk dengue transmission area in China
Source: PeerJ. 2024 Oct 22;12:e18246. doi: 10.7717/peerj.18246 (PMC11505881; doi:10.7717/peerj.18246)
Supplement: Data S4 [file peerj-12-18246-s004.xlsx]

## Sheet: Table S4
Additional file 4: Table S4. Ae. albopictus females collected per person per hour by the HDN method.
2021 (HDN) f/m/h
Study area	Jun	Jul	Aug	Sep	Annual average	F	P
YT	9.33333	16	14	10.6667	12.5	10.856	< 0.01
WY	12	21.3333	17.3333	13.3333	16
BL	14	17.3333	14	10	13.8333
YL	10	12.6667	10	7.33333	10
ZZ	6	15	8	6.66667	8.36364
LT	6	11	8	6	7.4
LN	5.33333	19	10.6667	6.66667	9.63636
CH	4.66667	18	10.6667	7.33333	9.45455
monthly average	8.41667	16.4	11.7391	8.5	11.033
2022 (HDN) f/m/h
Study area	Jun	Jul	Aug	Sep	Annual average	F	P
YT	11.3333	14	14.6667	12.6667	13.1667	5.119	< 0.01
WY	14	19.3333	20.6667	12.6667	16.6667
BL	10.6667	16	18.6667	15.3333	15.1667
YL	8.66667	14.6667	16	10.6667	12.5
ZZ	5.33333	9.33333	10.6667	8	8.36364
LT	4	10	14	5.33333	8.33333
LN	9	8	11.3333	7	9
CH	9.33333	12	14.6667	4	10
monthly average	9.04348	12.9167	15.0833	9.63636	11.7419
