# Supplementary material for: Ecological features and insecticide resistance of Aedes albopictus in Xi’an, a high-risk dengue transmission area in China
Source: PeerJ. 2024 Oct 22;12:e18246. doi: 10.7717/peerj.18246 (PMC11505881; doi:10.7717/peerj.18246)
Supplement: Data S5 [file peerj-12-18246-s005.xlsx]

## Sheet: Table S5
Additional file 5: Table S5. The results of Ae. albopictus females resistance to six insecticides.
Sampling sites	propoxur		deltamethrin		beta-cypermethrin		malathion		alpha-cypermethrin		chlorpyrifos
	total	death	total	death	total	death	total	death	total	death	total	death
YL	85	84	78	60	80	66	80	78	90	80	92	92
WY	86	84	70	64	65	65	82	82	85	85	75	70
YT	78	73	78	68	65	57	82	79	75	71	86	81
LN	85	84	80	65	73	73	82	82	85	79	80	80
CH	80	78	85	85	56	56	68	65	82	82	67	67
LT	90	73	84	76	73	66	80	80	85	85	75	72
ZZ	80	80	82	73	65	65	78	71	86	78	84	82
BL	90	88	75	75	85	83	92	92	86	86	84	84
Total	674	644	632	566	562	531	644	629	674	646	643	628
